# Supplementary material for: Transcriptional downregulation of MHC class I and melanoma de- differentiation in resistance to PD-1 inhibition
Source: PubMed Central journal article supplement (PMC7171183; doi:10.1038/s41467-020-15726-7), 2020-04-20
Supplement: 41467_2020_15726_MOESM1_ESM.pdf [file 41467_2020_15726_MOESM1_ESM.pdf]

**Transcriptional downregulation of MHC class I and melanoma de-differentiation in resistance to PD-1 inhibition**

Lee JH et al.

Figure S1

A

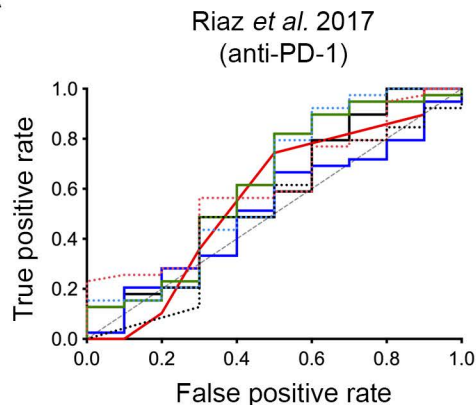

| Signature                | AUC    | p      |
|--------------------------|--------|--------|
| — IPRES                  | 0.5179 | 0.8621 |
| — IMPRES                 | 0.5667 | 0.5189 |
| — CYT score              | 0.6205 | 0.2436 |
| — TIDE                   | 0.5769 | 0.4568 |
| ⋯ 18-immune gene set     | 0.6128 | 0.2751 |
| ⋯ CD8A/CSF1R ratio       | 0.6026 | 0.3211 |
| ⋯ CD8+ T cells CIBERSORT | 0.5141 | 0.8915 |

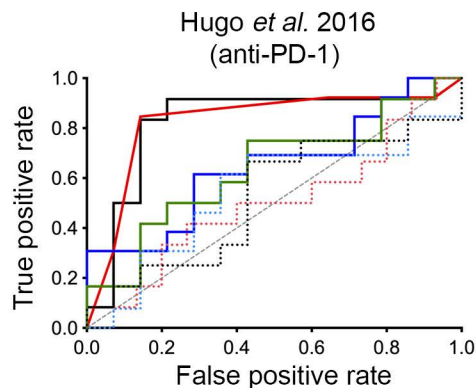

| Signature                | AUC    | p      |
|--------------------------|--------|--------|
| — IPRES                  | 0.6190 | 0.3036 |
| — IMPRES                 | 0.8214 | 0.0055 |
| — CYT score              | 0.6369 | 0.2368 |
| — TIDE                   | 0.8274 | 0.0047 |
| ⋯ 18-immune gene set     | 0.5774 | 0.5037 |
| ⋯ CD8A/CSF1R ratio       | 0.5056 | 0.9611 |
| ⋯ CD8+ T cells CIBERSORT | 0.5238 | 0.8370 |

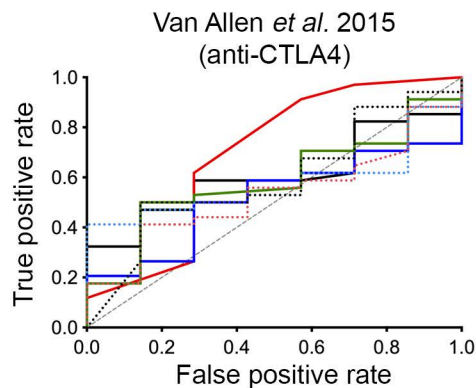

| Signature                | AUC    | p      | AUC <sup>1</sup> | p <sup>1</sup> |
|--------------------------|--------|--------|------------------|----------------|
| — IPRES                  | 0.5168 | 0.8898 | 0.6659           | 0.0669         |
| — IMPRES                 | 0.6891 | 0.1190 | 0.7632           | 0.0037         |
| — CYT score              | 0.5882 | 0.4669 | 0.6911           | 0.0349         |
| — TIDE                   | 0.6071 | 0.3770 | 0.8021           | 0.0009         |
| ⋯ 18-immune gene set     | 0.5798 | 0.5103 | 0.7277           | 0.0119         |
| ⋯ CD8A/CSF1R ratio       | 0.5336 | 0.7816 | 0.6499           | 0.0979         |
| ⋯ CD8+ T cells CIBERSORT | 0.5945 | 0.4356 | 0.7101           | 0.0223         |

<sup>1</sup>Performance of signatures in patients who showed clinical benefit (CR, PR or SD with overall survival >1 year) vs no clinical benefit (PD or SD with overall survival <1 year), as defined in the original study

## Supplementary Figure 1 Performance of immune-predictive transcriptome scores

Immune-predictive transcriptome scores derived for three publicly available immune checkpoint inhibitor melanoma datasets (GSE78220, GSE91061 and TPM-RSEM values for the Van Allen dataset<sup>1</sup> from GitHub: [https://github.com/vanallenlab/VanAllen\\_CTLA4\\_Science\\_RNASeq\\_TPM](https://github.com/vanallenlab/VanAllen_CTLA4_Science_RNASeq_TPM). PRE-treatment melanoma biopsies and patient response data (CR/PR vs SD/PD) were used to generate receiver operator characteristic (ROC) curves measuring the performance of each indicated signature in predicting PD-1 inhibitor responses in 49 patients treated with the PD-1 inhibitor, nivolumab<sup>2</sup>, 26 patients treated PD-1 inhibitors nivolumab or pembrolizumab<sup>3</sup> and 41 patients treated with anti-CTLA4 with RECIST data<sup>1</sup>. We also examined the transcriptome signatures in patients treated with anti-CTLA4 stratified according to clinical benefit vs no-clinical benefit as defined in the original report. Clinical benefit was defined as CR, PR or SD by RECIST with OS greater than 1 year and no clinical benefit was defined as PD or SD with OS less than 1 year<sup>2</sup>. The resulting AUCs and p values are tabulated. The signatures applied to our dataset were derived from the following references: IPRES signature<sup>3</sup>, IMPRES signature<sup>4</sup>, *CD8A/CSF1R* ratio<sup>5</sup>, 18-immune gene set<sup>6</sup>, TIDE<sup>7</sup>, CYT score<sup>8</sup> and CIBERSORT estimated relative proportion of CD8+ T cells<sup>9</sup>.

Figure S2

A

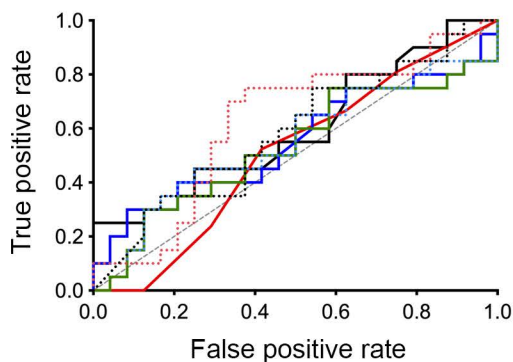

| Signature              | AUC    | p      |
|------------------------|--------|--------|
| IPRES                  | 0.5542 | 0.5400 |
| IMPRES                 | 0.5099 | 0.9094 |
| CYT score              | 0.5313 | 0.7237 |
| TIDE                   | 0.5979 | 0.2679 |
| 18-immune gene set     | 0.5563 | 0.5245 |
| CD8A/CSF1R ratio       | 0.6229 | 0.1643 |
| CD8+ T cells CIBERSORT | 0.5813 | 0.3580 |

B

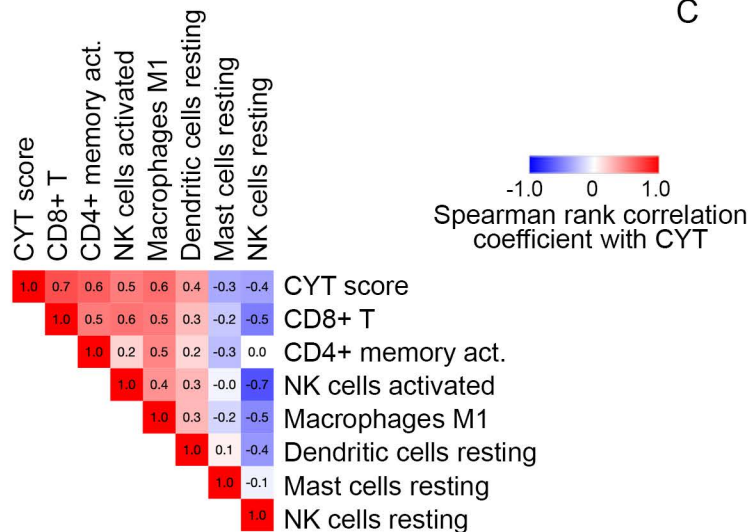

C

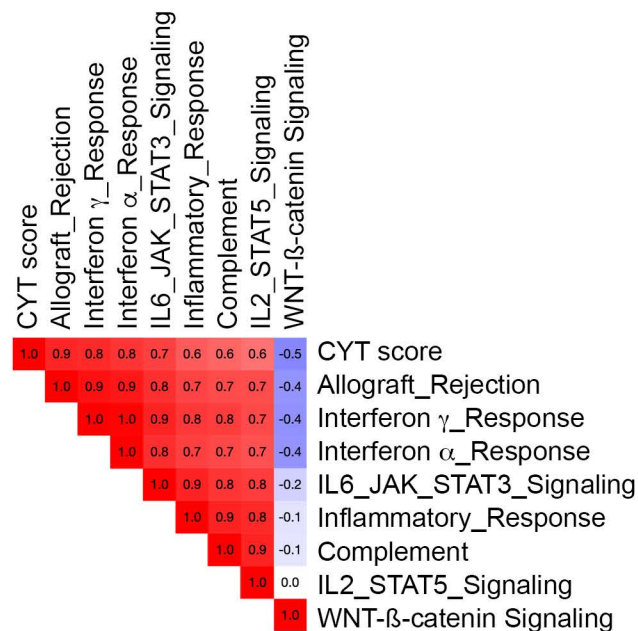

D

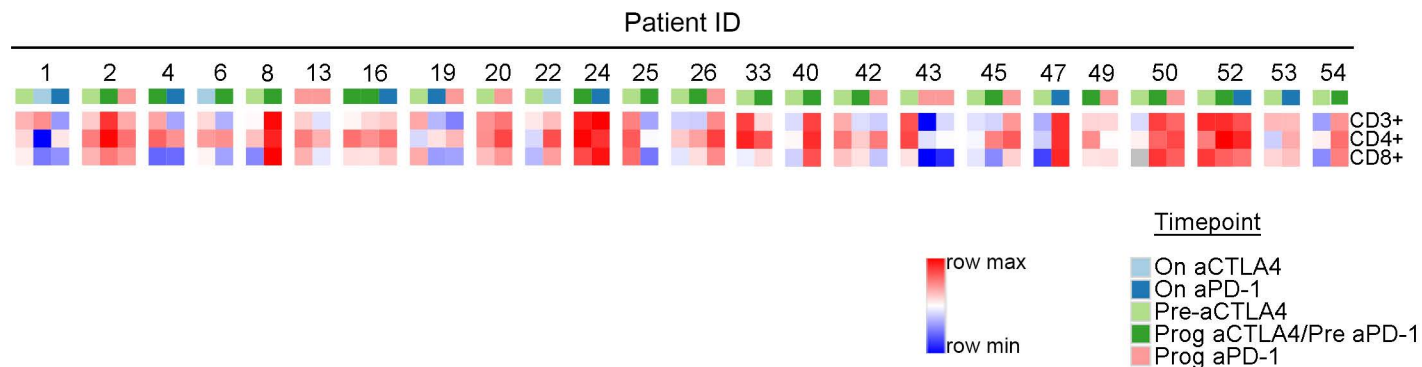

## Supplementary Figure 2 Immune profiling in melanoma biopsies

- (A) Immune-predictive transcriptome scores derived for each PRE-treatment melanoma biopsy (n=44) and patient or lesion response data were used to generate receiver operator characteristic (ROC) curves measuring the performance of each indicated signature in predicting PD-1 inhibitor responses in our patient cohort. In these analyses the response of four patients was changed to reflect the lesion-specific response assessment of the pre-treatment tumor (see Table 2). The resulting AUCs and p values are tabulated. The signatures applied to our dataset were derived from the following references: IPRES signature<sup>3</sup>, IMPRES signature<sup>4</sup>, *CD8A/CSF1R* ratio<sup>5</sup>, 18-immune gene set<sup>6</sup>, TIDE<sup>7</sup>, CYT score<sup>8</sup> and CIBERSORT estimated relative proportion of CD8+ T cells<sup>9</sup>
- (B) Correlation matrix of intra-tumoral cytolytic activity score (CYT, expression of *PRF1* and *GZMA*<sup>8</sup>) with CIBERSORT immune cell subset scores<sup>9</sup> in 79 melanoma biopsies. The Spearman rank correlation coefficients are shown within the matrix, and the false discovery adjusted p-value was < 0.01 for all signatures shown (see Supplementary Data 7)
- (C) Correlation matrix of intra-tumoral cytolytic activity score (CYT, expression of *PRF1* and *GZMA*<sup>8</sup>) with ssGSEA score derived from the indicated Hallmark immune-related signatures. The Spearman rank correlation coefficients are shown within the matrix, and the false discovery adjusted p-value was < 0.01 for all signatures shown (see Supplementary Data 7)
- (D) Heatmap showing immune cell profiling by IHC in longitudinal melanoma biopsies (pre-treatment, early on-treatment and late on-treatment) in patients undergoing sequential treatment with PD-1 or CTLA-4 inhibitors. Data derived from<sup>10</sup>

Figure S3

A

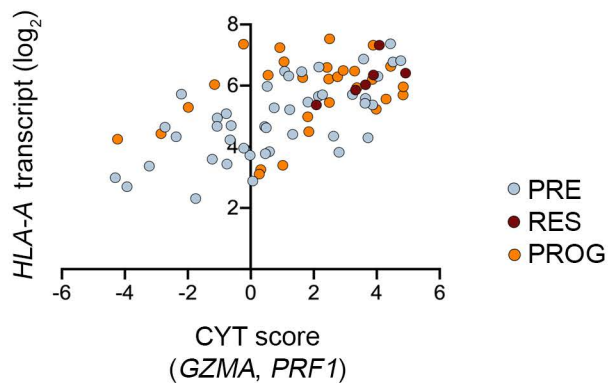

B

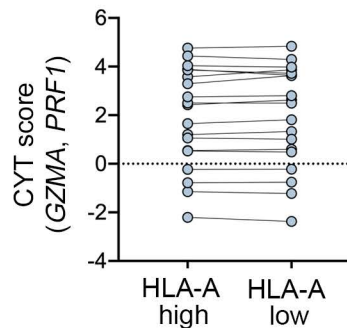

C

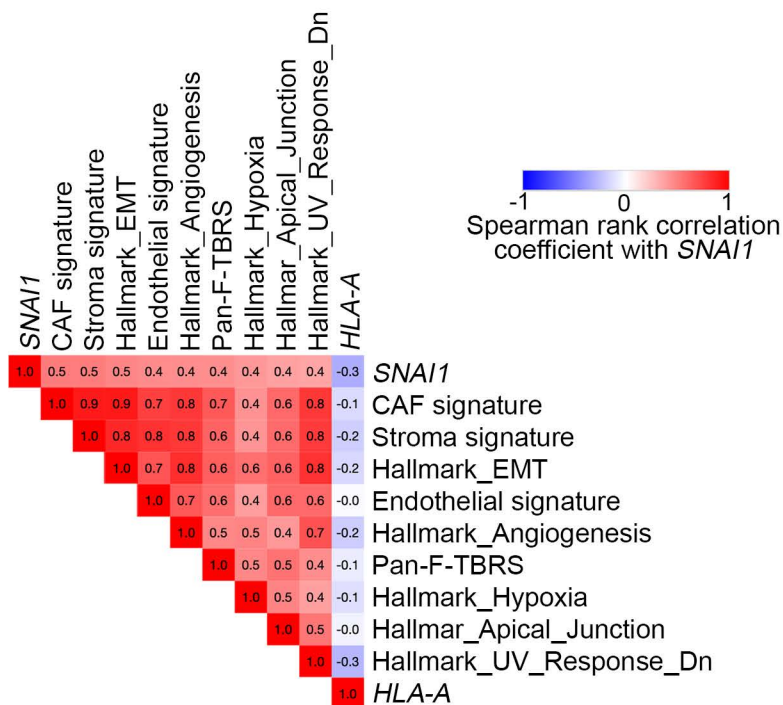

**Supplementary Figure 3 Association of transcriptome signatures with *HLA-A* downregulation and *SNAI1* transcript expression**

- (A) Scatter plot showing the relationship between CYT score and the expression of the *HLA-A* transcript in responding (RES; n=6), pre-treatment (PRE; n=44) and progressing biopsies (PROG; n=29).
- (B) Plots showing CYT score in the selected CYT score-matched tumors (n = 38) with high or low *HLA-A* transcript expression.
- (C) Correlation matrix of *SNAI1* gene expression with ssGSEA scores derived from the Hallmark gene set collection and stromal cell-specific transcriptome signatures<sup>11</sup> in the TCGA SKCM dataset. The Spearman rank correlation coefficients are shown within the matrix, and the false discovery adjusted p-value was < 0.01 for all signatures shown (see also Supplementary Data 7).

Figure S4

A

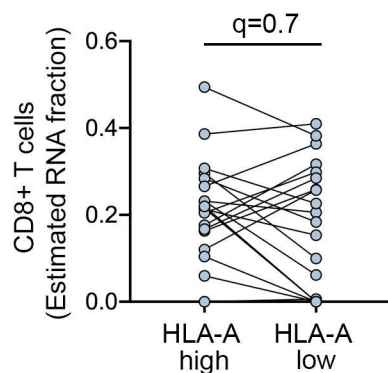

B

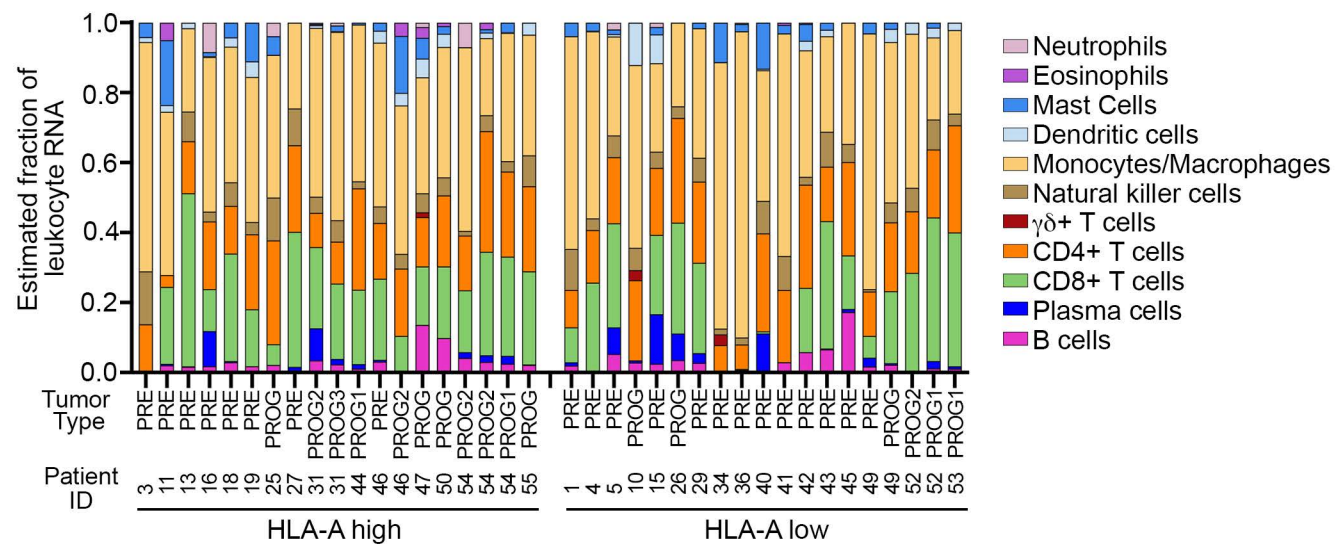

C

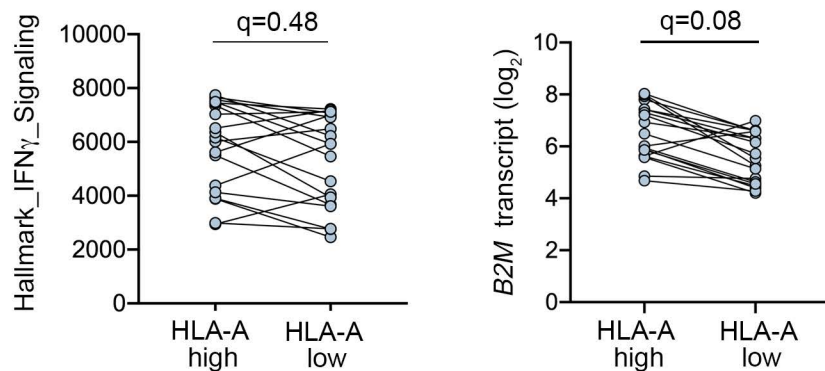



**Supplementary Figure 4 *HLA-A* transcript downregulation and immune cell subset and activation signatures**

- (A) Plot showing CD8+ T cell estimated fraction (CIBERSORT relative score) in the CYT score-matched tumors (n = 38) with low or high *HLA-A* transcript expression. FDR-adjusted p values (q) calculated using limma test.
- (B) Fractions of 11 major leukocyte cell subsets called by CIBERSORT in CYT score matched tumors (n=38) with high and low *HLA-A* transcript. No significant differences were observed in any immune subsets in the *HLA-A* high expression vs *HLA-A* low expression tumor subgroups (see Supplementary Data 6).
- (C) Plots showing Hallmark\_*IFN* $\gamma$ \_signaling (ssGSEA scores) and transcript levels *B2M* in the CYT score-matched tumors (n = 38) with low or high *HLA-A* transcript expression. FDR-adjusted p values (q) calculated using limma test.

Figure S5

A

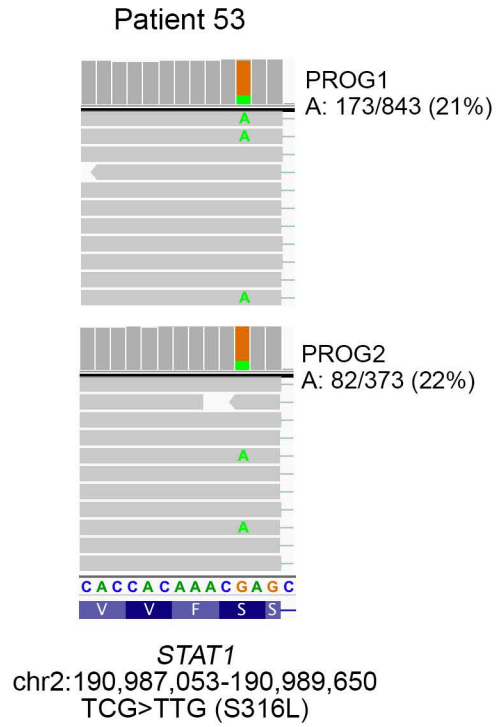

B

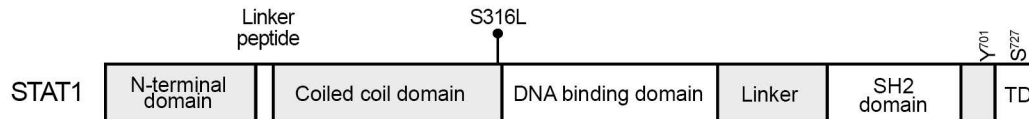

**Supplementary Figure 5 STAT1 missense mutations in PD-1 PROG tumors**

- (A) STAT1 missense mutation identified in the PD-1 PROG tumors derived from patient 53. The IGV compressed window shows wild type and variant alleles with variant frequency shown.
- (B) Schematic STAT1 protein showing functional domains and activating phosphorylation sites and the S316L mutation identified in Patient 53. TD, transactivation domain.

Figure S6

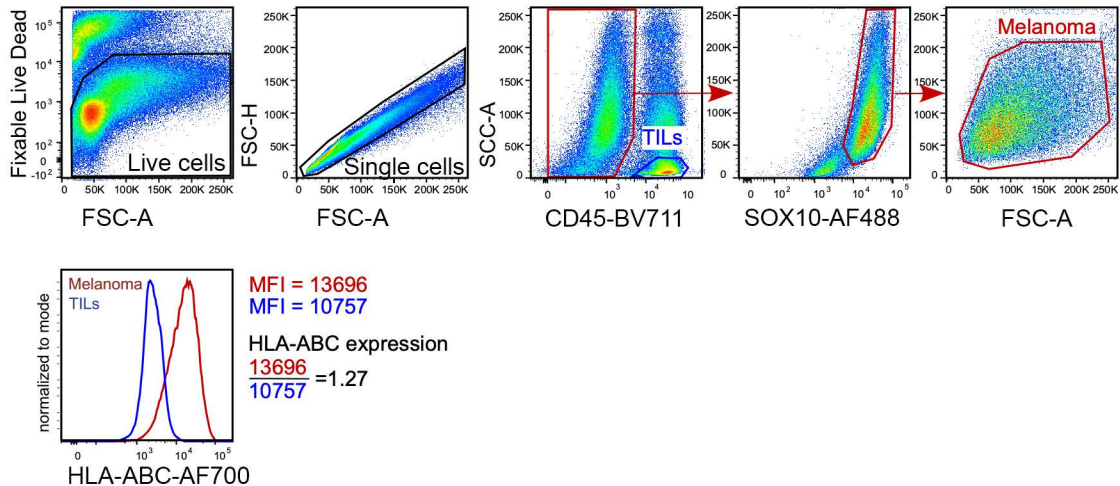

## **Supplementary Figure 6 Analysis of HLA-ABC expression in enzymatically dissociated tumors**

Dissociated tumors were gated for live cells and single cells; melanoma cells were identified as CD45-negative, SOX10-positive, forward and side scatter-high events (red), while tumor infiltrating lymphocytes (TILs) were identified as CD45-positive, side scatter-low events (blue).

Relative HLA-ABC expression (bottom panel) was determined as a ratio of geometric mean fluorescence intensities (MFI) of melanoma cells and TILs within each sample.

Figure S7

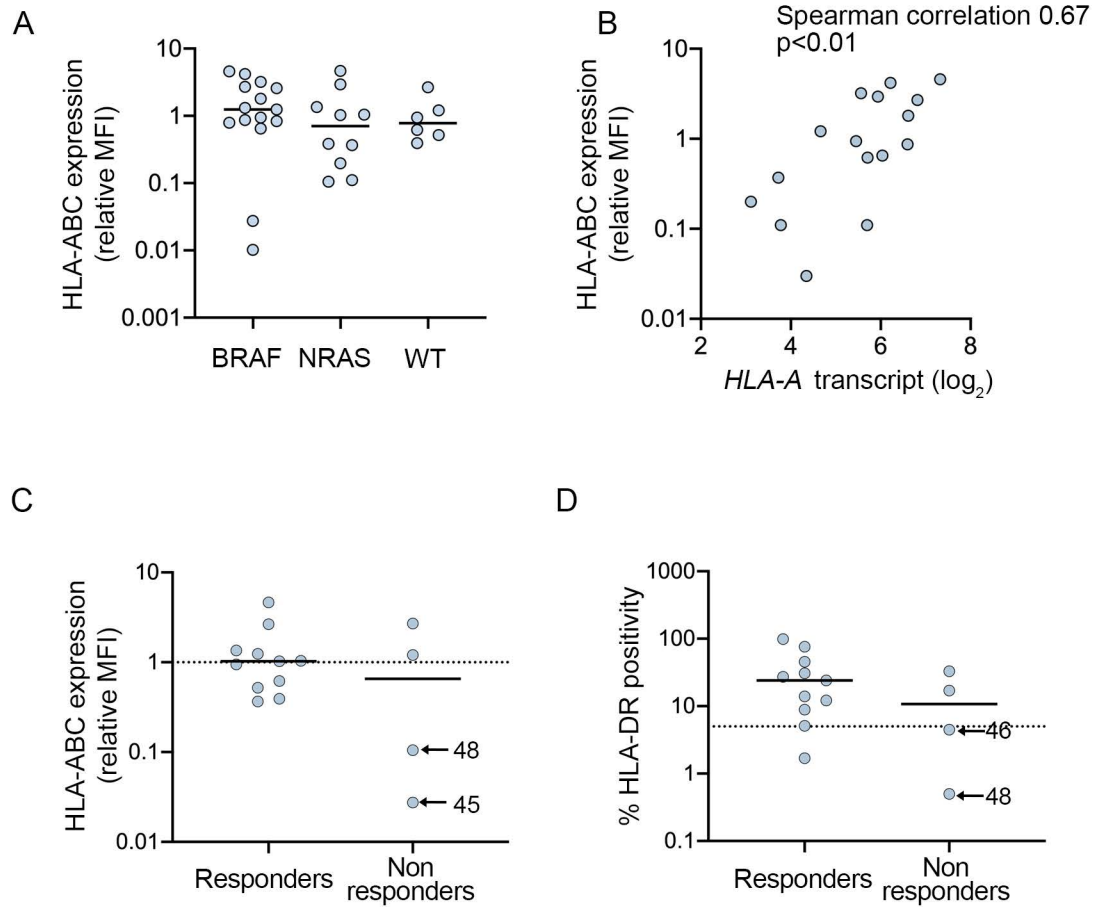

## Supplementary Figure 7 Analysis HLA-ABC expression in BRAF-mutant, RAS-mutant and BRAF/RAS wild type melanoma

- (A) Cell surface expression of HLA-ABC in 31 melanoma tumors with defined oncogenic driver mutations, including 15 *BRAF*-mutant, 10 *N/KRAS*-mutant and 6 *BRAF/NRAS* wild type (WT). HLA-ABC expression is calculated relative to HLA-ABC in tumor-infiltrating lymphocytes. There was no significant difference in the relative HLA-ABC expression between three melanoma genotypes; Kruskal-Wallis test with Dunn's multiple comparison test.
- (B) Scatter plot showing the relationship between *HLA-A* transcript expression and HLA-ABC cell surface expression score in 16 melanoma tumors with flow cytometry and RNA sequence data.
- (C) Cell surface expression of HLA-ABC (relative to HLA-ABC in tumor-infiltrating lymphocytes) in melanoma cells derived from fresh dissociates of pre-treatment tumors grouped according to patient response to PD-1 inhibition. Solid lines represent median and dotted line set at  $Y=1$ . Patients with CR or PR were classified as responders, while patients with SD and PD were classified as non-responders
- (D) Cell surface expression of HLA-DR (percent HLA-DR positivity) in melanoma cells derived from fresh dissociates of pre-treatment tumors grouped according to patient response to PD-1 inhibition. Solid lines represent median and dotted line set at  $Y=5\%$ . Patients with CR or PR were classified as responders, while patients with SD and PD were classified as non-responders.

Figure S8

A

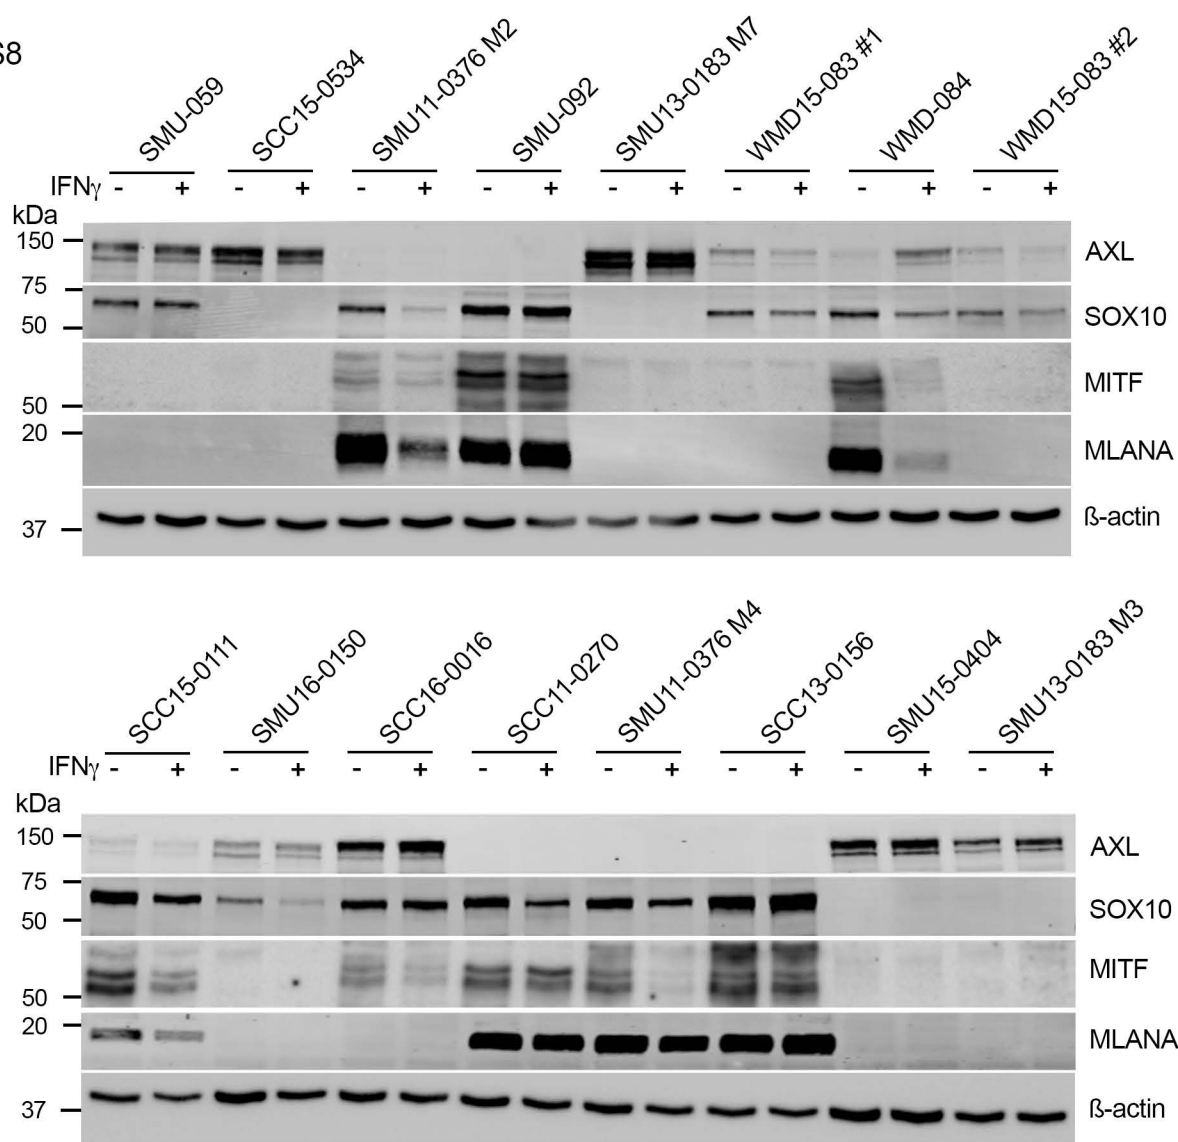

B

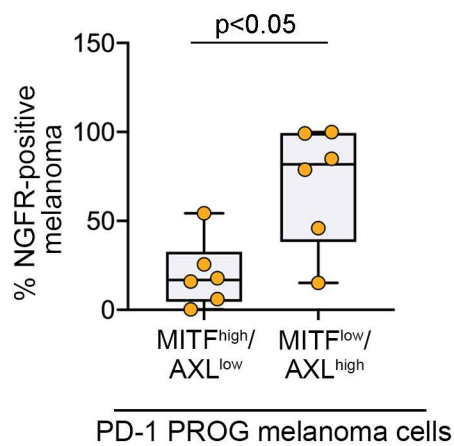



**Supplementary Figure 8 MITF<sup>low</sup>/AXL<sup>high</sup> de-differentiation in short term PD-1 PROG cell lines**

(A) Western blots of cell lysates showing protein markers of differentiation (SOX10, MLANA, MITF) and de-differentiation (AXL) 24 h after treating cells with vehicle (-) or 1000 U/ml IFN $\gamma$  (+). REVERT stain shown in Supplementary Figure 11B.

(B) Percentage of NGFR-positive (de-differentiated) melanoma cells in fresh tumor samples used to derive matching short-term PD-1 PROG melanoma cell lines with the MITF<sup>high</sup>/AXL<sup>low</sup> (differentiated phenotype) or MITF<sup>low</sup>/AXL<sup>high</sup> dedifferentiated phenotype. Box plots show the median and interquartile ranges, and data were compared using Mann Whitney test.

Figure S9

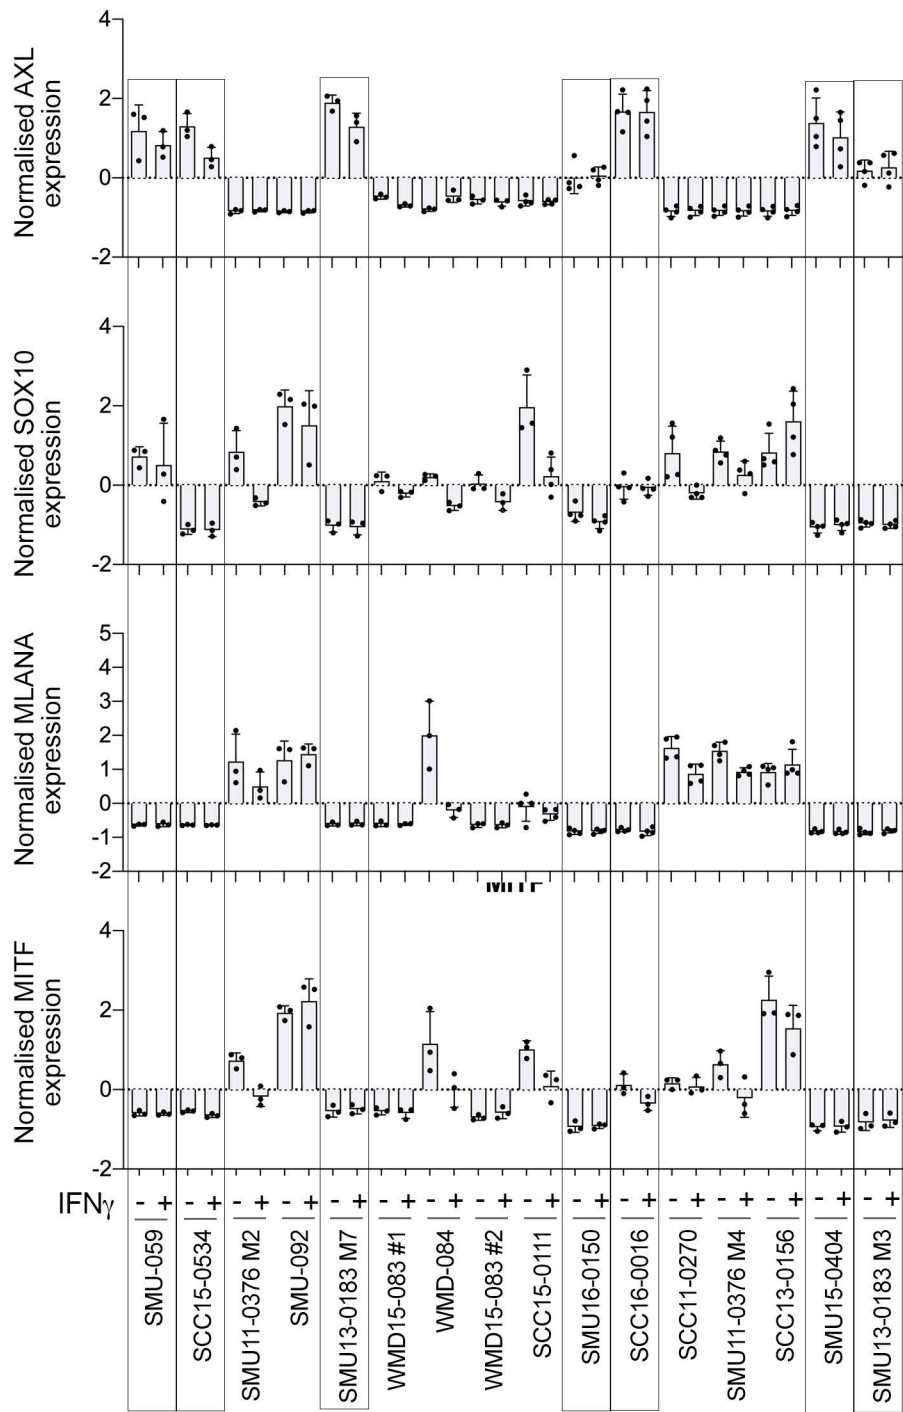

## **Supplementary Figure 9 Quantitation of melanoma de-differentiation protein markers in PD-1 PROG cell lines**

Quantitation of AXL, SOX10, MLANA expression normalised to REVERT and MITF expression normalised to  $\beta$ -actin (converted to z-scores to enable analysis of three biological western blot replicates). Average and standard deviation of z-scores are shown and representative western blot images are shown in Supplementary Figure 8. Melanoma cell lines classified as de-differentiated based on MITF<sup>low</sup>/AXL<sup>high</sup> expression are boxed.

Figure S10

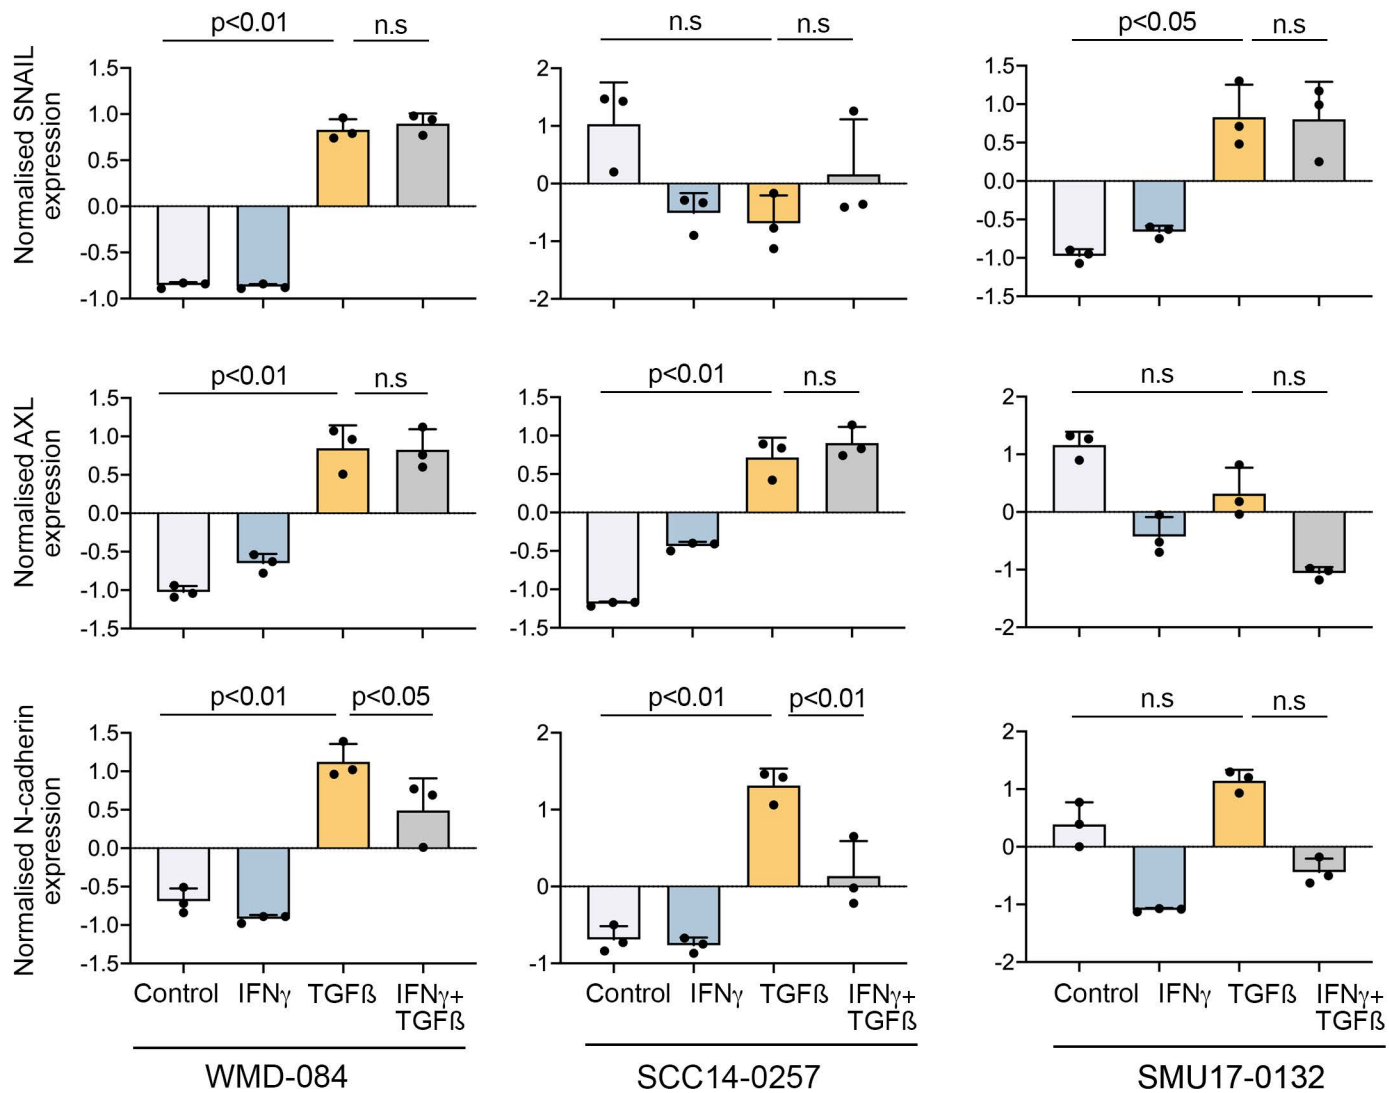

**Supplementary Figure 10 Quantitation of melanoma de-differentiation protein markers in response to IFN $\gamma$  and/or TGF $\beta$  in melanoma cell lines**

Quantitation of de-differentiation markers SNAIL, AXL and N-cadherin normalised to REVERT stain in WMD-084, SCC14-0257 and SMU17-0132 melanoma cells treated with vehicle (Control), 1000 U/ml IFN $\gamma$ - and/or 10 ng/ml TGF $\beta$  for 72 h. Normalised protein expression data were converted to z-scores to enable analysis of three biological western blot replicates. Average and standard deviation of z-scores are shown and representative western blot images are shown in Figure 5C. Data were compared using one-way ANOVA with the Geisser-Greenhouse correction.

## References

1. Van Allen, E.M., *et al.* Genomic correlates of response to CTLA4 blockade in metastatic melanoma. *Science* (2015).
2. Riaz, N., *et al.* Tumor and Microenvironment Evolution during Immunotherapy with Nivolumab. *Cell* **171**, 934-949.e915 (2017).
3. Hugo, W., *et al.* Genomic and Transcriptomic Features of Response to Anti-PD-1 Therapy in Metastatic Melanoma. *Cell* **165**, 35-44 (2016).
4. Auslander, N., *et al.* Robust prediction of response to immune checkpoint blockade therapy in metastatic melanoma. *Nat Med* **24**, 1545-1549 (2018).
5. Neubert, N.J., *et al.* T cell-induced CSF1 promotes melanoma resistance to PD1 blockade. *Sci Transl Med* **10**(2018).
6. Ayers, M., *et al.* IFN-gamma-related mRNA profile predicts clinical response to PD-1 blockade. *J Clin Invest* **127**, 2930-2940 (2017).
7. Jiang, P., *et al.* Signatures of T cell dysfunction and exclusion predict cancer immunotherapy response. *Nat Med* (2018).
8. Rooney, M.S., Shukla, S.A., Wu, C.J., Getz, G. & Hacothen, N. Molecular and genetic properties of tumors associated with local immune cytolytic activity. *Cell* **160**, 48-61 (2015).
9. Newman, A.M., *et al.* Robust enumeration of cell subsets from tissue expression profiles. *Nat Methods* **12**, 453-457 (2015).
10. Chen, P.L., *et al.* Analysis of Immune Signatures in Longitudinal Tumor Samples Yields Insight into Biomarkers of Response and Mechanisms of Resistance to Immune Checkpoint Blockade. *Cancer Discov* **6**, 827-837 (2016).
11. Jerby-Arnon, L., *et al.* A Cancer Cell Program Promotes T Cell Exclusion and Resistance to Checkpoint Blockade. *Cell* **175**, 984-997.e924 (2018).
